# Supplementary material
Source: PubMed Central journal article supplement (PMC5915189)
Supplement: EHP1674.s001.acco.pdf [file EHP1674.s001.acco.pdf]

**Note to readers with disabilities:** *EHP* strives to ensure that all journal content is accessible to all readers. However, some figures and Supplemental Material published in *EHP* articles may not conform to [508 standards](#) due to the complexity of the information being presented. If you need assistance accessing journal content, please contact [ehp508@niehs.nih.gov](mailto:ehp508@niehs.nih.gov). Our staff will work with you to assess and meet your accessibility needs within 3 working days.

### **Supplemental Material**

#### **Sex- and Dose-Specific Effects of Maternal Bisphenol A Exposure on Pancreatic Islets of First- and Second-Generation Adult Mice Offspring**

Amita Bansal, Cetewayo Rashid, Frances Xin, Changhong Li, Erzsebet Polyak, Anna Duemler, Tom van der Meer, Martha Stefaniak, Sana Wajid, Nicolai Doliba, Marisa S. Bartolomei, and Rebecca A. Simmons

#### **Table of Contents**

**Figure S1.** Experimental paradigm of maternal BPA exposure study.

**Figure S2.** Flowchart of animal usage from multiple cohorts generated in two different animal care facilities.

**Figure S3.** Representative photos of H&E stained pancreatic sections from F1 and F2 males.

**Figure S4.** Alpha and Delta mass adjusted for body weight in F1 and F2 males.

**Figure S5.** Islet cytosolic calcium levels in (A) F1 males, and (B) F2 males.

**Figure S6.** Percent DNA methylation at *H19/Igf2* ICR (*H19* 1524JH) and *Esr1* Exon C in islets. (A) F1 and (B) F2 adult male offspring. Data are percent CpG methylation values from individual litter (islets pooled from 2-3 males per litter) and presented as mean + SEM. Data were analyzed using Dunnett's test. For % methylation at all CpG sites as well as mean methylation across all sites, p values were >0.1 relative to Control.

**Table S1.** Custom designed TaqMan Primers and Probes Assays for qPCR.

**Table S2.** PCR and Pyrosequencing Primers for *Igf2* DMR1, *H19/Igf2* ICR, and *Esr1*.

**Table S3.** Changes in cytokine/chemokine levels on a LUMINEX assay in pancreatic lysates of F1 adult male offspring. N=3 to 4 litters per group. Data are normalized to total protein concentration as pg of cytokine or chemokine per  $\mu\text{g}$  of total protein, and presented as mean  $\pm$  SEM. Decimal places are represented by E notation, where E represents base 10, followed by the power of 10 (example, E-2 =  $10^{-2}$ , E-3 =  $10^{-3}$ , E-4 =  $10^{-4}$ ). P values are from Dunnett's test performed on log-transformed data, where required (g-csf, IL9, IL15, and RANTES). Control: 7% corn oil diet; LowerB: Lower BPA (10  $\mu\text{g}/\text{kg}/\text{day}$ ); UpperB: Upper BPA (10  $\text{mg}/\text{kg}/\text{day}$ ).

**Table S4.** Changes in cytokine/chemokine levels on a LUMINEX assay in pancreatic lysates of F2 adult male offspring. N=3 to 4 litters per group. Data are normalized to total protein concentration as pg of cytokine or chemokine per  $\mu\text{g}$  of total protein, and presented as mean (SEM). Decimal places are represented by E notation, where E represents base 10, followed by the power of 10 (example, E-2 =  $10^{-2}$ , E-3 =  $10^{-3}$ , E-4 =  $10^{-4}$ ). p values are from Dunnett's test performed on log-transformed data, where required (IL2, IL9, IL10, IL12p40, IL15, IP10, and MIP2). Control: 7% corn oil diet; LowerB: Lower BPA (10  $\mu\text{g}/\text{kg}/\text{day}$ ); UpperB: Upper BPA (10  $\text{mg}/\text{kg}/\text{day}$ ).

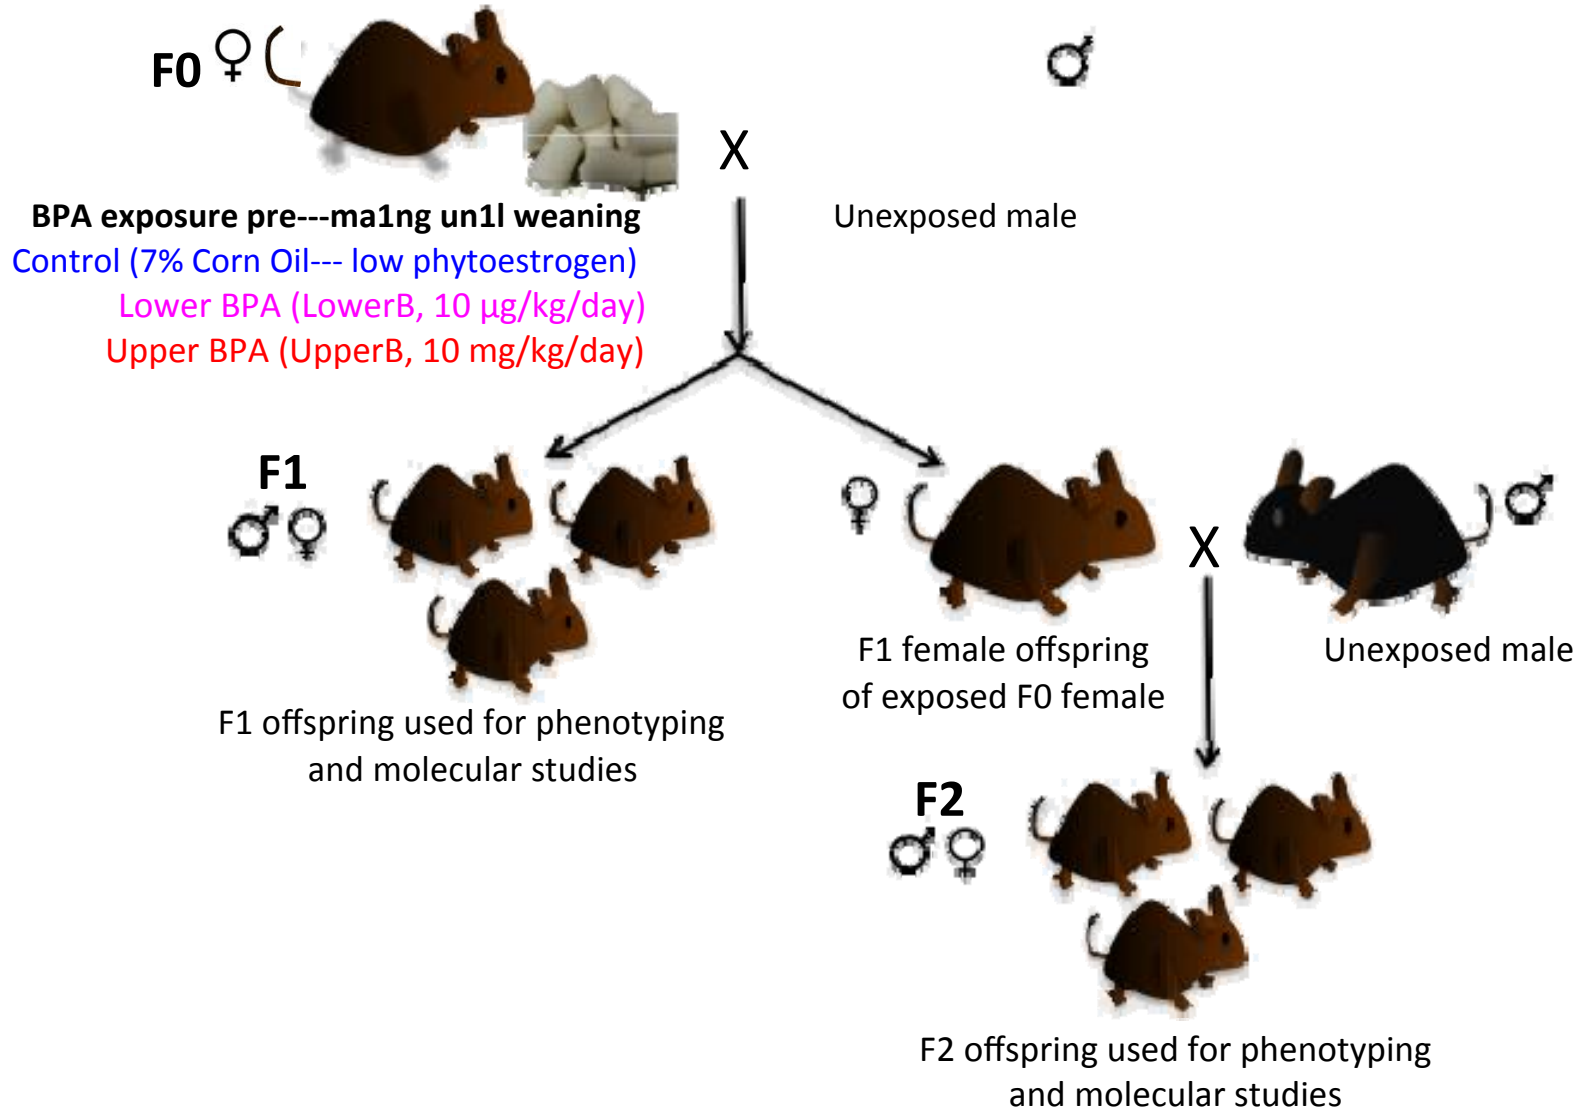

**Fig.S1. Experimental paradigm of maternal BPA exposure study.** C57BL/6 virgin female mice (F0) were randomly assigned to the following three diets: 7% corn oil (Control), 10 µg/kg/day (LowerB), and 10 mg/kg/day (UpperB) BPA. After two weeks, while continuing on these diets, the females were time-mated to unexposed C57BL/6J males and once pregnant designated as the “F0”. The females were allowed to deliver and raise their offspring (F1) until weaning. At postnatal day (PND) 21, all F1 mice were weaned on to the control diet, so the exposure to BPA was limited to gestation and lactation only. All subsequent generations were maintained on the control diet as well. A subset of F1 females were time-mated to unexposed C57BL/6J males and allowed to deliver and raise their offspring (F2) until weaning. The only time when F2 offspring were exposed to BPA was as ovulum of the F1 females during gestation and lactation.

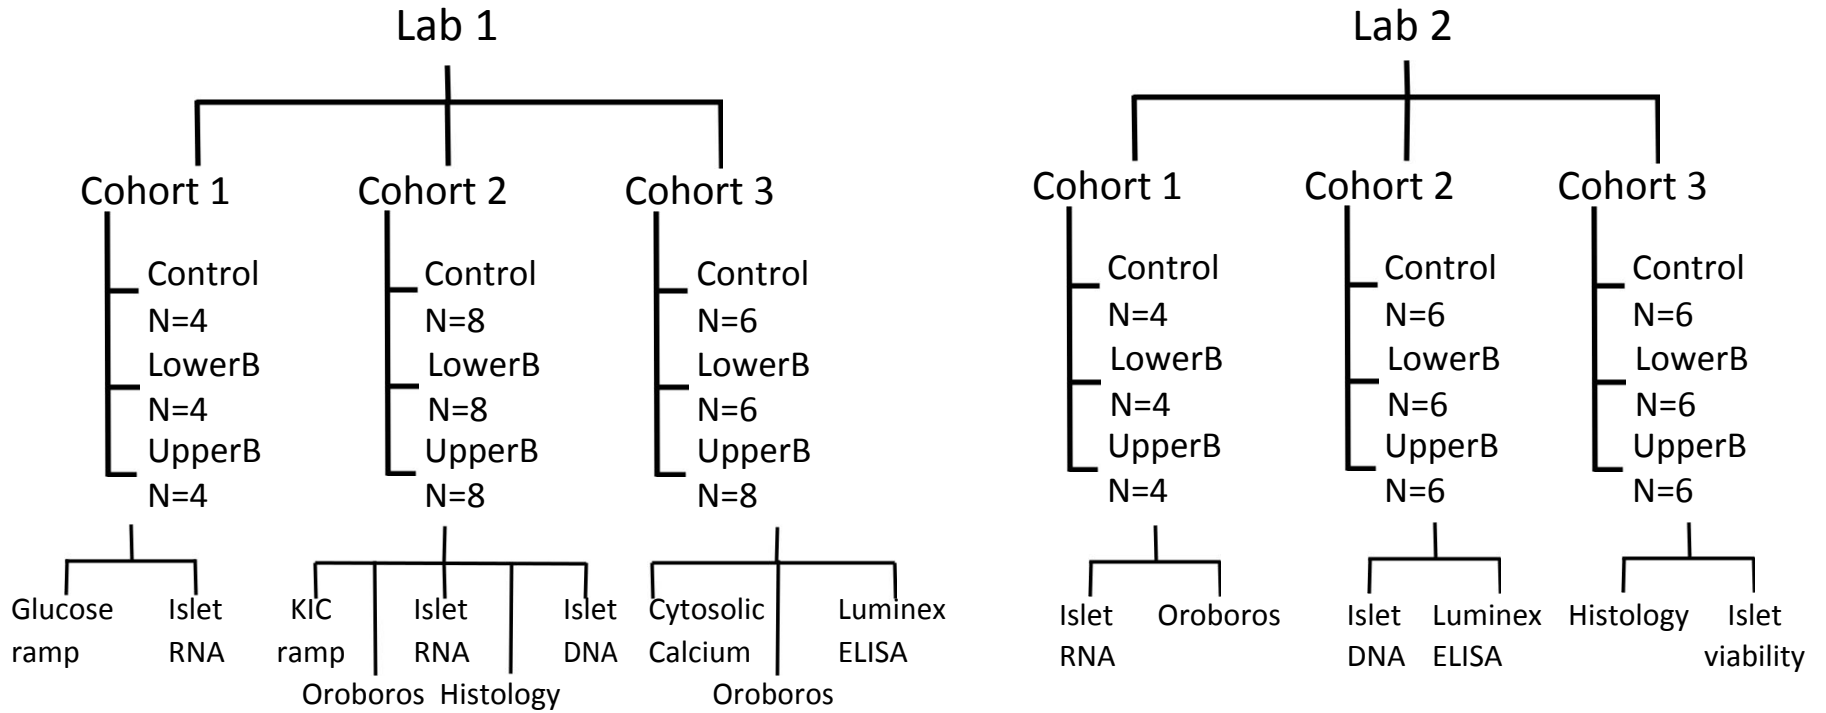

**Fig.S2. Flowchart of animal usage from multiple cohorts generated in two different animal care facilities.** N are number of litters. 2 to 5 male offspring and 2 to 5 female offspring per litter. KIC:  $\alpha$ -keto isocaproate.

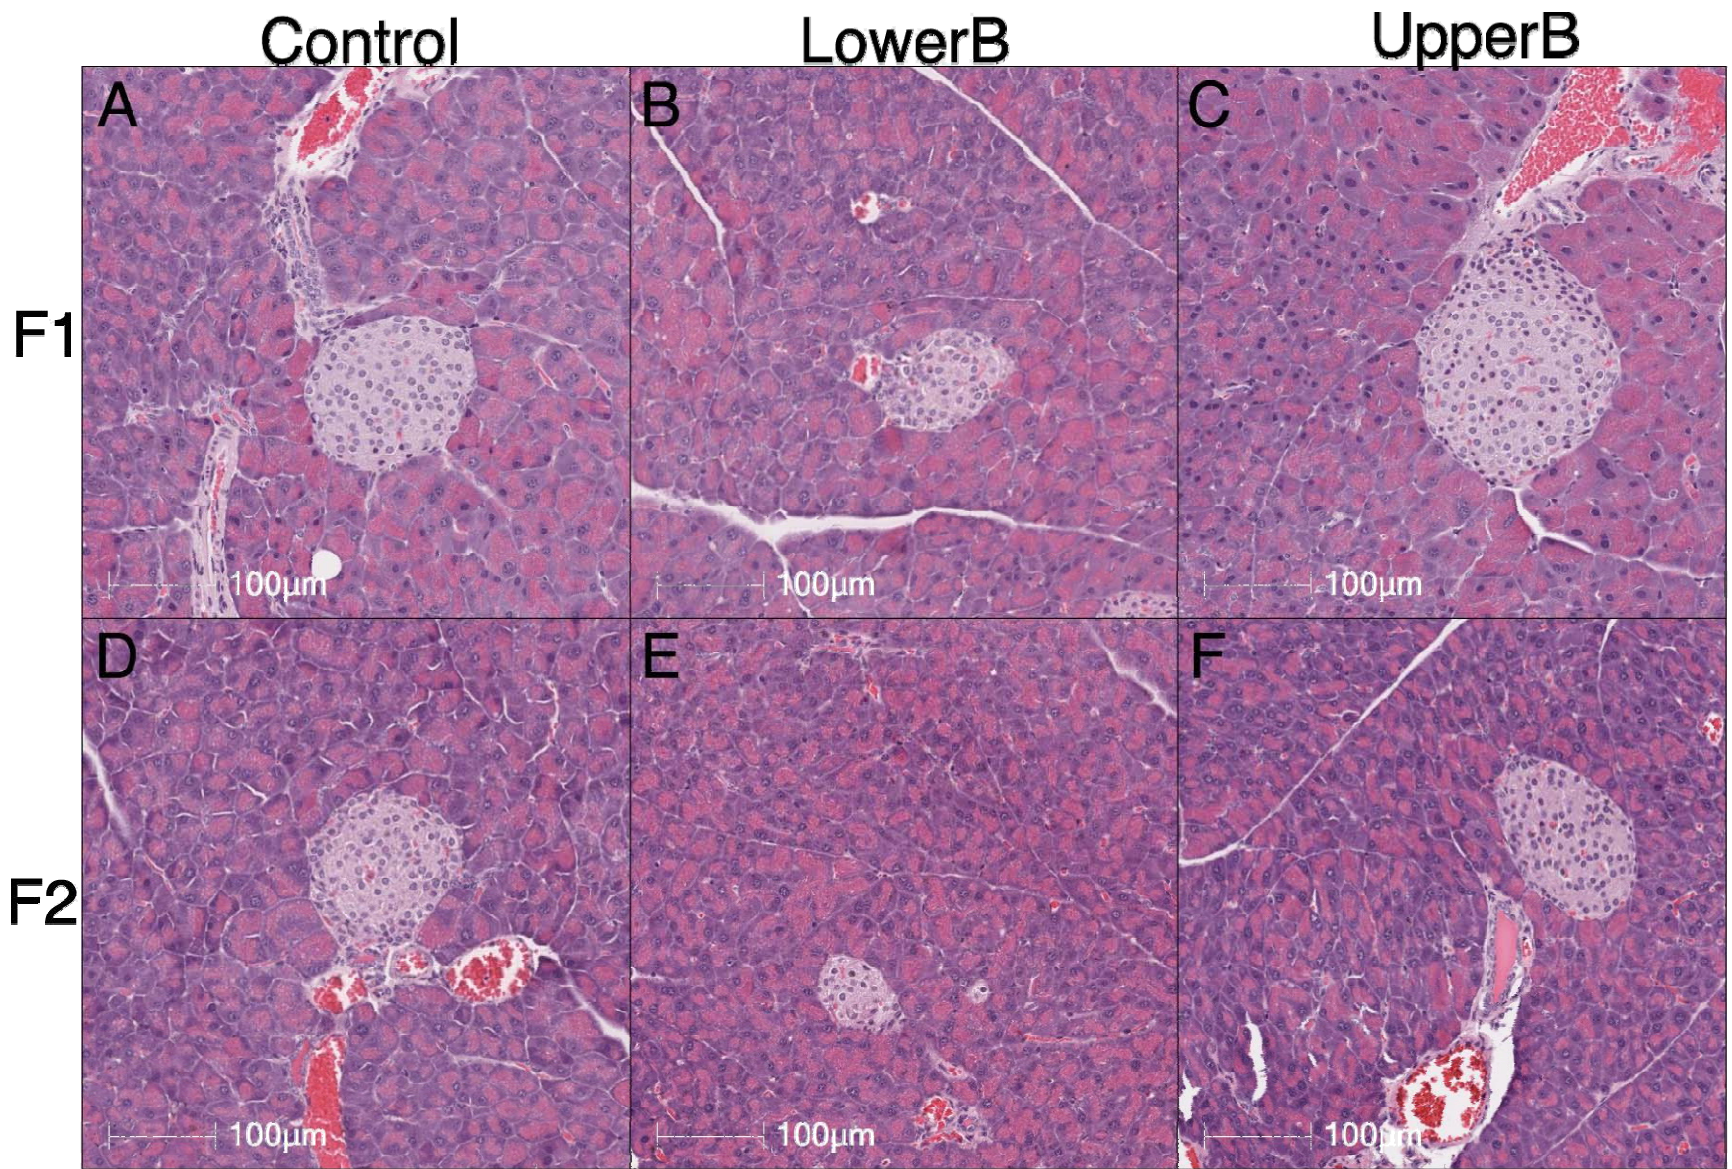

**Fig.S3.** Representative photos of H&E stained pancreatic sections from F1 and F2 males. (A-C) F1 males, and (D-F) F2 males.

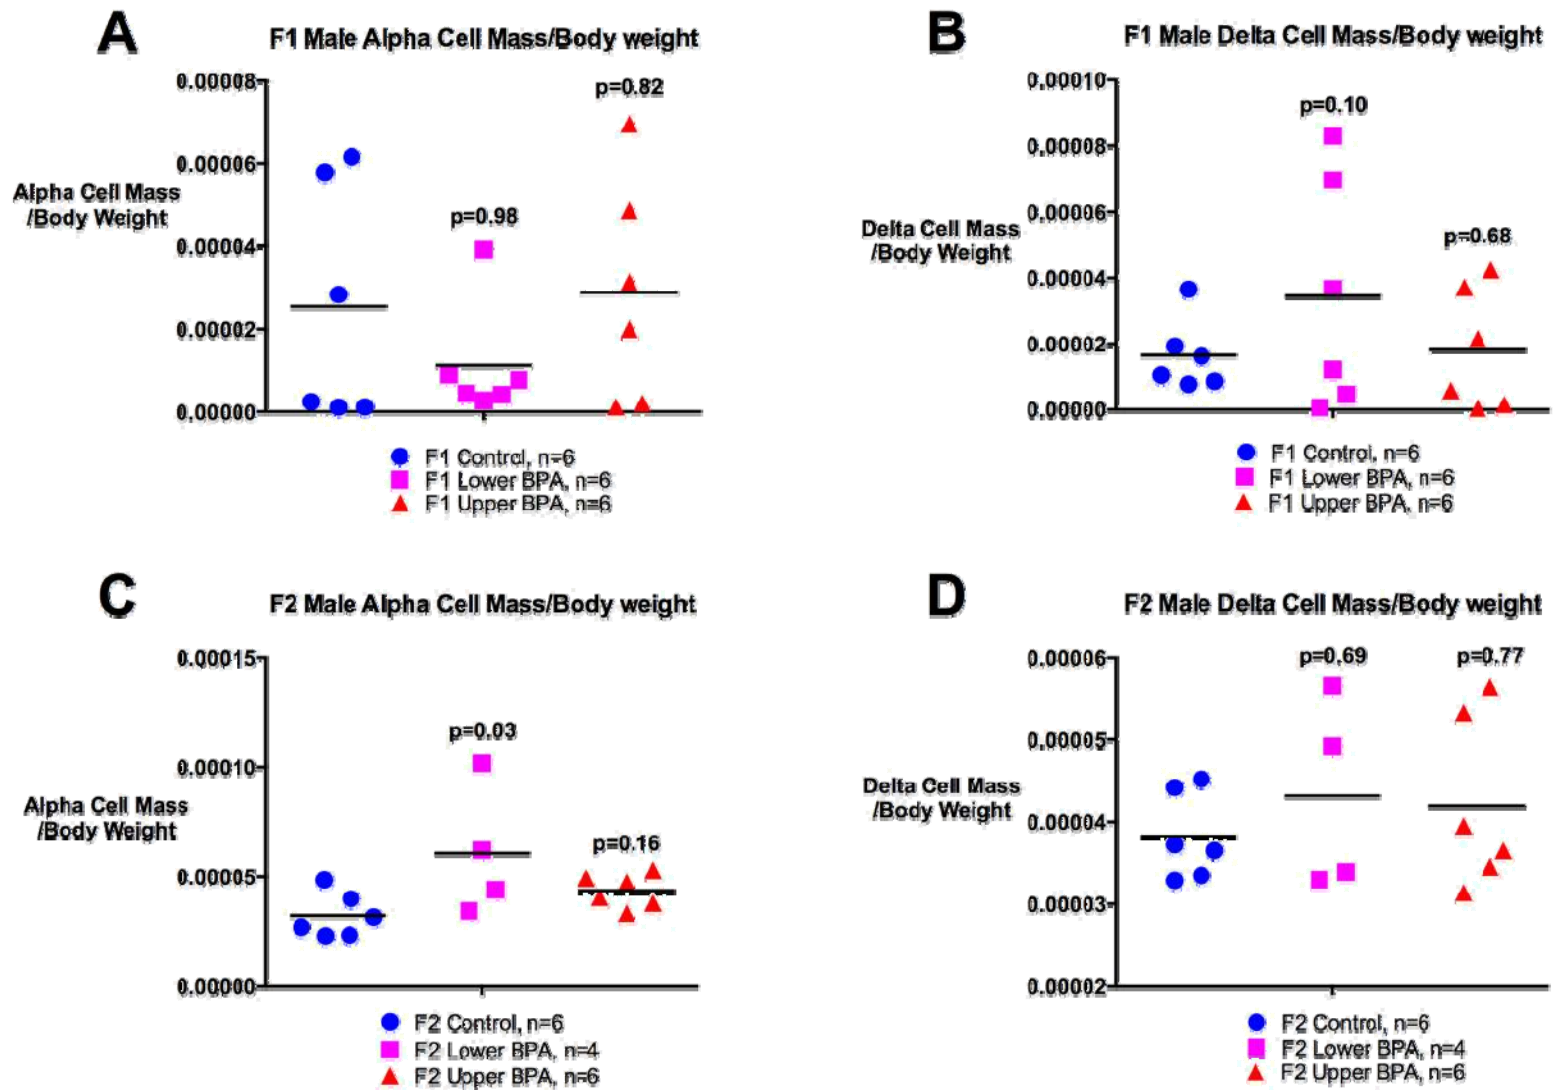

**Fig. S4. Alpha and Delta mass adjusted for body weight in F1 and F2 males: (A-B) F1 males, and (C-D) F2 males.** Data are individual litter data (one animal per litter) with mean superimposed. Data were analyzed using Dunnett's test performed on log-transformed data, where required (F1 alpha and delta, F2 alpha and delta); P values are relative to Control.

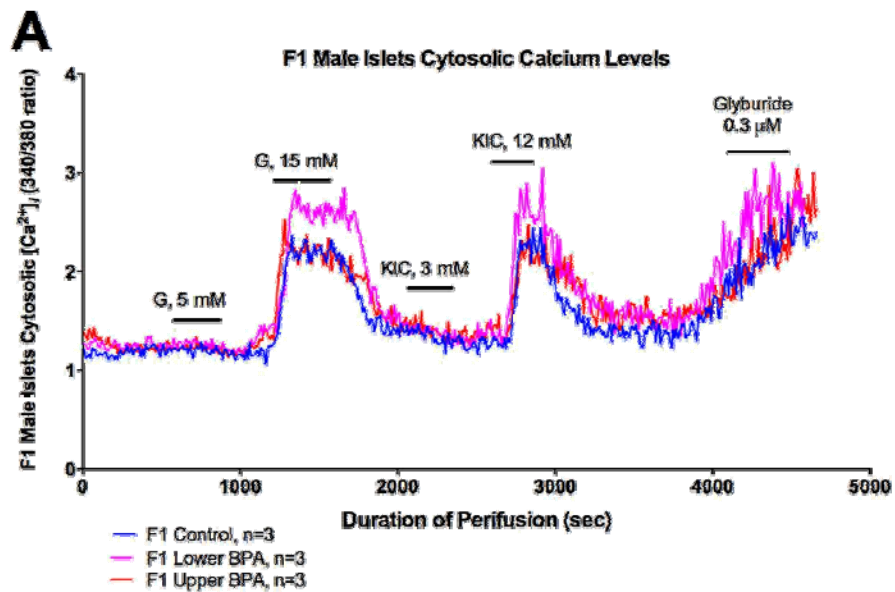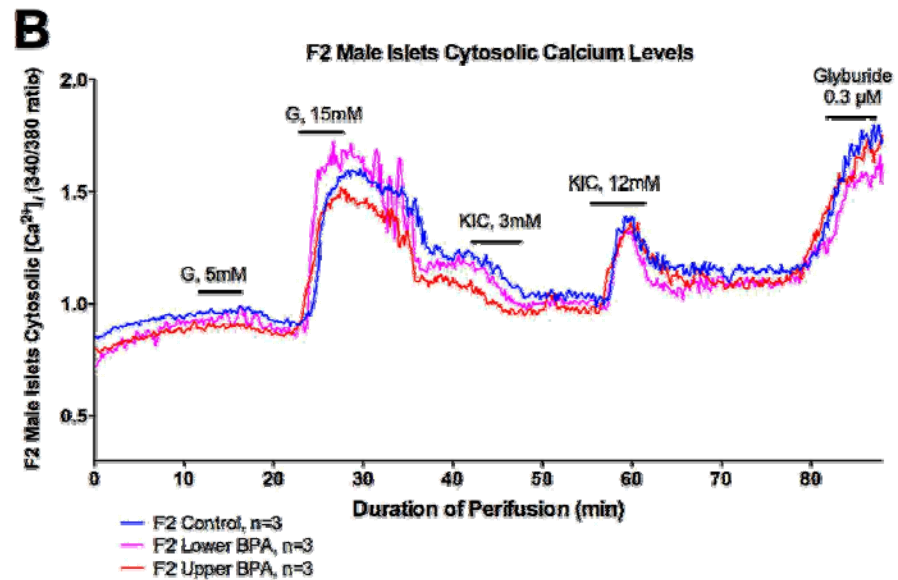

**Fig. S5. Islet cytosolic calcium levels in (A) F1 males, and (B) F2 males.** Data are expressed as mean values. G: glucose; KIC:  $\alpha$ -ketoisocaproate.

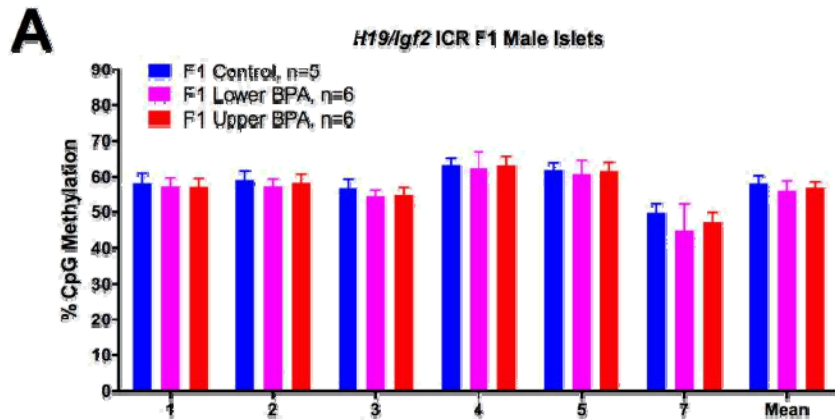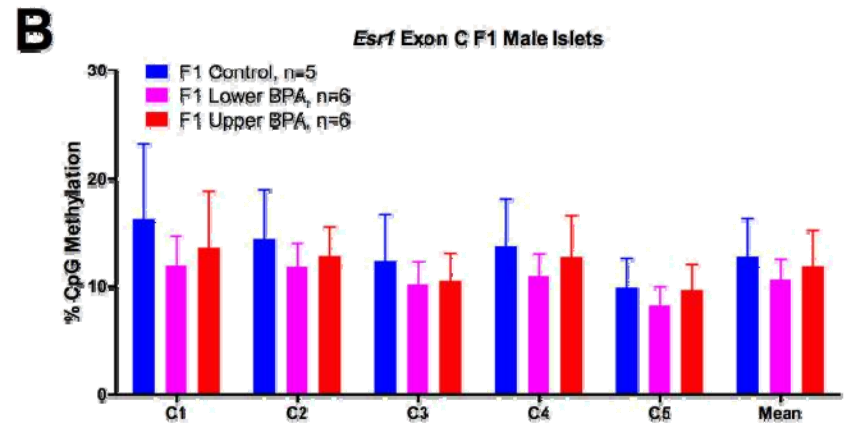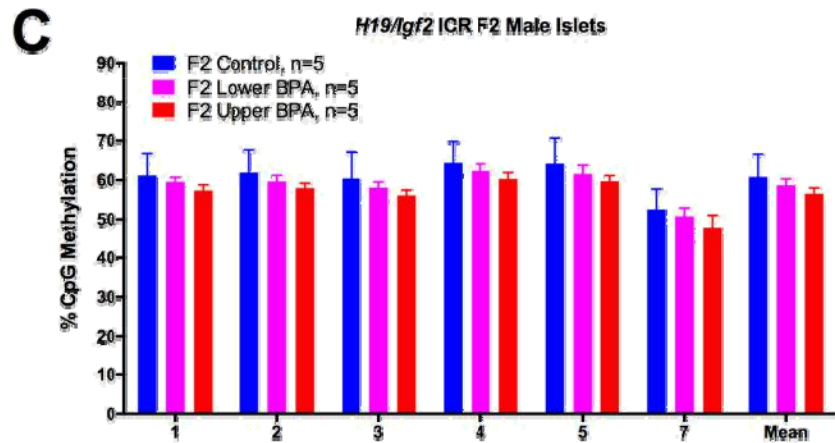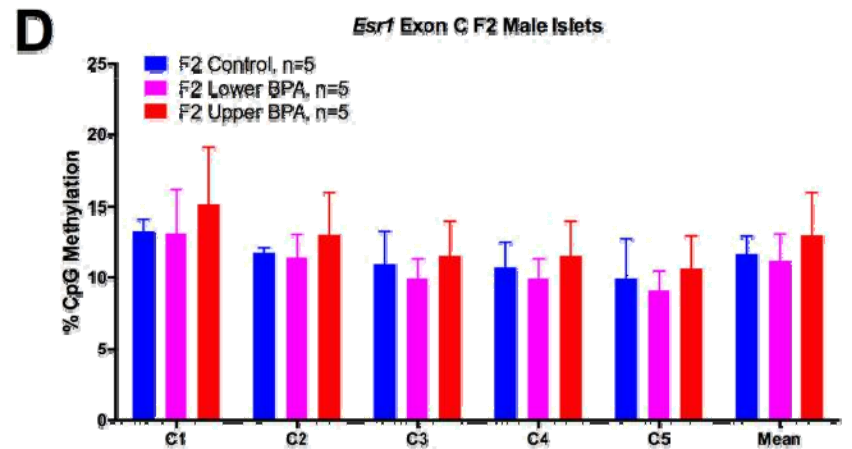

**Fig.S6. Percent DNA methylation at *H19/Igf2* ICR (*H19* 1524JH) and *Esr1* Exon C in islets: (A) F1 and (B) F2 adult male offspring.** Data are percent CpG methylation values from individual litter (islets pooled from 2-3 males per litter) and presented as mean + SEM. Data were analyzed using Dunnett's test. For %methylation at all CpG cites as well as mean methylation across all sites, p values were >0.1 relative to Control.



**Table S1.** Custom designed TaqMan Primers and Probes Assays for qPCR.

| <b>Serial #</b> | <b>Gene Name</b>    | <b>Species</b> | <b>Assay ID</b> | <b>Amplicon Length (bp)</b> | <b>Assay Design</b>                             |
|-----------------|---------------------|----------------|-----------------|-----------------------------|-------------------------------------------------|
| 1               | <i>Pdx1</i>         | Species: Mouse | Mm00435565_m1   | 74                          | Probe spans exons                               |
| 2               | <i>Igf1</i>         | Species: Mouse | Mm00439560_m1   | 77                          | Probe spans exons                               |
| 3               | <i>Igf2</i>         | Species: Mouse | Mm00439564_m1   | 107                         | Probe spans exons                               |
| 4               | <i>Esr1</i>         | Species: Mouse | Mm00433147_m1   | 99                          | Probe spans exons                               |
| 5               | <i>Hnf1a</i>        | Species: Mouse | Mm00493434_m1   | 134                         | Probe spans exons                               |
| 6               | <i>Ucp2</i>         | Species: Mouse | Mm00627599_m1   | 137                         | Probe spans exons                               |
| 7               | <i>Ogdh</i>         | Species: Mouse | Mm00803119_m1   | 90                          | Probe spans exons                               |
| 8               | <i>Kcnj11</i>       | Species: Mouse | Mm00440050_s1   | 129                         | Both primers and probe map within a single exon |
| 9               | <i>Abcc8</i>        | Species: Mouse | Mm00803458_g1   | 106                         | Probe spans exons                               |
| 10              | <i>Snap25</i>       | Species: Mouse | Mm00456922_m1   | 90                          | Probe spans exons                               |
| 11              | <i>Beta actin</i>   | Species: Mouse | Mm00607939_s1   | 115                         | Both primers and probe map within a single exon |
| 12              | <i>Cyclopilin A</i> | Species: Mouse | Mm02342430_g1   | 148                         | Probe spans exons                               |
| 13              | <i>Rpl19</i>        | Species: Mouse | Mm02601633_g1   | 69                          | Probe spans exons                               |
| 14              | <i>Hprt</i>         | Species: Mouse | Mm01545399_m1   | 81                          | Probe spans exons                               |

**Table S2.** PCR and Pyrosequencing Primers for *Igf2* DMR1, *H19/Igf2* ICR, and *Esr1*

| Genes               | Primer Type                     | Primer Sequence                              | CpG sites            |
|---------------------|---------------------------------|----------------------------------------------|----------------------|
| <i>Igf2</i> DMR1    | PCR forward primer              | 5'- TGAGGTTAGATTAGGTTGTAAGTT-3'              |                      |
|                     | PCR reverse-biotinylated primer | 5'- /5Biosg/CTTCCCTACCCCTTAAACC -3'          |                      |
|                     | Pyrosequencing primer S1        | 5'- GGATTTTGTTAGGTAGGA -3'                   | 1 and 2              |
| <i>H19/Igf2</i> ICR | PCR forward primer              | 5'- GGGTAGGATATATGTATTTTTTTAGGTTG -3'        |                      |
|                     | PCR reverse-biotinylated primer | 5'- /5Biosg/CTCATAAAACCCATAACTATAAAATCAT -3' |                      |
|                     | Pyrosequencing primer           | 5'- TGTAAGATTAGGGTTGT- 3'                    | 1, 2, 3, 4, 5, and 7 |
| <i>Esr1</i> Exon A  | PCR forward primer              | 5'- TGGGTTATTTGTGTTTTGTAGGATAG -3'           |                      |
|                     | PCR reverse-biotinylated primer | 5'- /5Biosg/CTTAAATCTAATACAACAAAACCATTC -3'  |                      |
|                     | Pyrosequencing primer F1        | 5'- GGTAGGGTTAGGGTTAGTAT -3'                 | A1-A4                |
|                     | Pyrosequencing primer F2        | 5'- AGGTTTTATTTTTTTTTTTTAGGTGG -3'           | A5-A11               |
| <i>Esr1</i> Exon C  | PCR forward primer              | 5'- TATGGGTTTGTAGAAGTTAAGGGTTGAG -3'         |                      |
|                     | PCR reverse-biotinylated primer | 5'- /5Biosg/CCAAATACCCTACCTACTAACTACTTCC -3' |                      |
|                     | Pyrosequencing primer F1        | 5'- GAAGTTAAGGGTTGAGATA -3'                  | C1-C5                |

**Table S3.** Changes in cytokine/chemokine levels on a LUMINEX assay in pancreatic lysates of F1 adult male offspring. N=3 to 4 litters per group. Data are normalized to total protein concentration as pg of cytokine or chemokine per  $\mu\text{g}$  of total protein, and presented as mean  $\pm$  SEM. Decimal places are represented by E notation, where E represents base 10, followed by the power of 10 (example, E-2 =  $10^{-2}$ , E-3 =  $10^{-3}$ , E-4 =  $10^{-4}$ ). P values are from Dunnett's test performed on log-transformed data, where required (g-csf, IL9, IL15, and RANTES). Control: 7% corn oil diet; LowerB: Lower BPA (10  $\mu\text{g}/\text{kg}/\text{day}$ ); UpperB: Upper BPA (10  $\text{mg}/\text{kg}/\text{day}$ ).

| Cytokine/<br>Chemokine | Produced By                                                                                   | Respond To                                                                                                          | Control<br>pg/ $\mu$ g | LowerB<br>pg/ $\mu$ g | UpperB<br>pg/ $\mu$ g | LowerB<br>p value | UpperB<br>p value |
|------------------------|-----------------------------------------------------------------------------------------------|---------------------------------------------------------------------------------------------------------------------|------------------------|-----------------------|-----------------------|-------------------|-------------------|
| G-CSF                  | Neutrophil                                                                                    | growth                                                                                                              | 1E-3<br>$\pm$ 4E-4     | 1E-3<br>$\pm$ 5E-3    | 2E-3<br>$\pm$ 5E-4    | 0.99              | 0.04              |
| GM-CSF                 | Monocyte growth                                                                               |                                                                                                                     | 2E-3<br>$\pm$ 5E-4     | 2E-3<br>$\pm$ 6E-4    | 3E-3<br>$\pm$ 6E-4    | 0.96              | 0.49              |
| IL1a                   | Macrophages,<br>Neutrophils, Epithelial<br>and Endothelial cells                              | cells with IL1a<br>receptor                                                                                         | 6E-3<br>$\pm$ 2E-3     | 3E-3<br>$\pm$ 2E-3    | 5E-3<br>$\pm$ 2E-3    | 0.32              | 0.86              |
| IL2                    |                                                                                               | Immature<br>T cells $\nearrow$ Treg                                                                                 | 13E-4<br>$\pm$ 2E-4    | 13E-4<br>$\pm$ 3E-4   | 12E-4<br>$\pm$ 3E-4   | 0.99              | 0.94              |
| IL9                    | CD4 <sup>+</sup> cells                                                                        | Cells that have IL9R,<br>$\times$ co-stimulatory<br>molecules of<br>Macrophages,<br>$\times$ B-cells, $\times$ NFkB | 6E-3<br>$\pm$ 4E-3     | 7E-3<br>$\pm$ 6E-3    | 18E-3<br>$\pm$ 5E-3   | 0.94              | 0.07              |
| IL10                   | mostly by Monocytes,<br>less commonly by T <sub>H</sub> 2,<br>Mast and T <sub>Reg</sub> cells | $\times$ T <sub>H</sub> 1,<br>$\times$ MHCII                                                                        | 6E-3<br>$\pm$ 2E-3     | 11E-3<br>$\pm$ 2E-3   | 5E-3<br>$\pm$ 2E-3    | 0.29              | 0.78              |
| IL12p40                | activated Macrophages                                                                         | T <sub>H</sub> 1, Natural killer<br>cells                                                                           | 1E-3<br>$\pm$ 1E-3     | 2E-3<br>$\pm$ 2E-3    | 5E-3<br>$\pm$ 2E-3    | 0.89              | 0.25              |
| IL13                   | T <sub>H</sub> 2                                                                              | Same cells that<br>respond to IL4                                                                                   | 2E-3<br>$\pm$ 5E-4     | 1E-3<br>$\pm$ 6E-4    | 1E-3<br>$\pm$ 6E-4    | 0.34              | 0.15              |
| IL15                   | Macrophages                                                                                   | $\times$ T cell growth                                                                                              | 2E-3<br>$\pm$ 7E-4     | 3E-3<br>$\pm$ 8E-4    | 5E-3<br>$\pm$ 8E-4    | 0.88              | 0.12              |
| IP10                   | Macrophages<br>Endothelial cells,<br>Fibroblast                                               | attracts<br>Macrophages,<br>T-cells, Natural killer<br>cells, Dendritic cells,                                      | 3E-3<br>$\pm$ 1E-3     | 2E-3<br>$\pm$ 1E-3    | 4E-3<br>$\pm$ 1E-3    | 0.53              | 0.81              |
| MIP2                   | Macrophages                                                                                   | Neutrophils, Stem<br>cells                                                                                          | 5E-3<br>$\pm$ 1E-3     | 4E-3<br>$\pm$ 1E-3    | 7E-3<br>$\pm$ 1E-3    | 0.99              | 0.21              |
| RANTES                 | +<br>CD8 <sup>+</sup> cells                                                                   | Chemoattractant,<br>T cells, Eosinophils,<br>Basophils, Natural<br>killer cell proliferation                        | 5E-4<br>$\pm$ 2E-4     | 3E-4<br>$\pm$ 2E-4    | 4E-4<br>$\pm$ 2E-4    | 0.75              | 0.99              |

**Table S4.** Changes in cytokine/chemokine levels on a LUMINEX assay in pancreatic lysates of F2 adult male offspring. N=3 to 4 litters per group. Data are normalized to total protein concentration as pg of cytokine or chemokine per  $\mu\text{g}$  of total protein, and presented as mean (SEM). Decimal places are represented by E notation, where E represents base 10, followed by the power of 10 (example, E-2 =  $10^{-2}$ , E-3 =  $10^{-3}$ , E-4 =  $10^{-4}$ ). p values are from Dunnett's test performed on log-transformed data, where required (IL2, IL9, IL10, IL12p40, IL15, IP10, and MIP2). Control: 7% corn oil diet; LowerB: Lower BPA (10  $\mu\text{g}/\text{kg}/\text{day}$ ); UpperB: Upper BPA (10  $\text{mg}/\text{kg}/\text{day}$ ).

| Cytokine/<br>Chemokine | Produced By                                                                                                 | Respond To                                                                                                                             | Control<br>pg/ $\mu$ g | LowerB<br>pg/ $\mu$ g | UpperB<br>pg/ $\mu$ g | LowerB<br>p value | UpperB<br>p value |
|------------------------|-------------------------------------------------------------------------------------------------------------|----------------------------------------------------------------------------------------------------------------------------------------|------------------------|-----------------------|-----------------------|-------------------|-------------------|
| G-CSF                  | Neutrophil growth                                                                                           |                                                                                                                                        | 1E-3<br>$\pm$ 5E-4     | 2E-3<br>$\pm$ 5E-4    | 2E-3<br>$\pm$ 5E-4    | 0.36              | 0.19              |
| GM-CSF                 | Monocyte growth                                                                                             |                                                                                                                                        | 1E-3<br>$\pm$ 6E-4     | 2E-3<br>$\pm$ 6E-4    | 2E-3<br>$\pm$ 6E-4    | 0.59              | 0.74              |
| IL1a                   | Macrophages,<br>Neutrophils, Epithelial<br>and Endothelial cells                                            | cells with IL1a<br>receptor                                                                                                            | 1E-3<br>$\pm$ 2E-2     | 1E-3<br>$\pm$ 2E-2    | 25E-3<br>$\pm$ 1E-2   | 0.99              | 0.75              |
| IL2                    |                                                                                                             | Immature<br>T cells $\rightarrow$ Treg                                                                                                 | 1E-3<br>$\pm$ 2E-3     | 1E-3<br>$\pm$ 2E-3    | 3E-3<br>$\pm$ 2E-3    | 0.86              | 0.88              |
| IL9                    | CD4 <sup>+</sup> cells                                                                                      | Cells that have IL9R,<br>$\rightarrow$ co-stimulatory<br><br>molecules of<br>Macrophages,<br>$\rightarrow$ B-cells, $\rightarrow$ NFkB | 23E-3<br>$\pm$ 5E-2    | 78E-3<br>$\pm$ 5E-2   | 92E-3<br>$\pm$ 5E-2   | 0.79              | 0.95              |
| IL10                   | mostly by Monocytes,<br>less commonly by T <sub>h</sub> 2,<br><small>Mast and T<sub>reg</sub> cells</small> | $\rightarrow$ T <sub>h</sub> 1,<br>$\rightarrow$ MHCII                                                                                 | 13E-3<br>$\pm$ 1E-2    | 7E-3<br>$\pm$ 1E-2    | 17E-3<br>$\pm$ 1E-2   | 0.85              | 0.72              |
| IL12p40                | activated Macrophages                                                                                       | T <sub>h</sub> 1, Natural killer cells                                                                                                 | 2E-3<br>$\pm$ 2E-3     | 2E-3<br>$\pm$ 2E-3    | 4E-3<br>$\pm$ 1E-3    | 0.73              | 0.55              |
| IL13                   | T <sub>h</sub> 2                                                                                            | Same cells that<br>respond to IL4                                                                                                      | 1E-3<br>$\pm$ 3E-4     | 1E-3<br>$\pm$ 3E-4    | 1E-3<br>$\pm$ 3E-4    | 0.39              | 0.99              |
| IL15                   | Macrophages                                                                                                 | $\rightarrow$ T cell growth                                                                                                            | 3E-3<br>$\pm$ 5E-3     | 7E-3<br>$\pm$ 5E-3    | 11E-3<br>$\pm$ 4E-3   | 0.51              | 0.50              |
| IP10                   | Macrophages<br>Endothelial cells,<br>Fibroblast                                                             | attracts Macrophages,<br>T-cells, Natural killer<br>cells, Dendritic cells,                                                            | 3E-3<br>$\pm$ 3E-3     | 3E-3<br>$\pm$ 3E-3    | 6E-3<br>$\pm$ 3E-3    | 0.91              | 0.83              |
| MIP2                   | Macrophages                                                                                                 | Neutrophils, Stem<br>cells                                                                                                             | 1E-2<br>$\pm$ 1E-2     | 14E-3<br>$\pm$ 1E-2   | 24E-3<br>$\pm$ 1E-2   | 0.75              | 0.48              |
| RANTES                 | +<br>CD8 cells                                                                                              | Chemoattractant,<br>T cells, Eosinophils,<br>Basophils, Natural<br>killer cell proliferation                                           | 1E-3<br>$\pm$ 2E-4     | 1E-3<br>$\pm$ 2E-4    | 1E-4<br>$\pm$ 2E-4    | 0.35              | 0.24              |
